1 **Identification of a family of *Vibrio* type III secretion system effectors that contain a**  
2 **conserved serine/threonine kinase domain**

3

4 Plaza N<sup>1</sup>, Garcia K<sup>1</sup>, Waldor MK<sup>2,3,4</sup>, Blondel CJ<sup>5\*</sup>

5

6 <sup>1</sup> Instituto de Ciencias Biomédicas, Facultad de Ciencias de la Salud, Universidad  
7 Autónoma de Chile, Santiago, Chile

8 <sup>2</sup> Division of Infectious Diseases, Brigham & Women's Hospital, Boston, USA

9 <sup>3</sup> Department of Microbiology, Harvard Medical School, Boston, USA

10 <sup>4</sup> Howard Hughes Medical Institute, Boston, USA

11 <sup>5</sup> Instituto de Ciencias Biomédicas, Facultad de Medicina y Facultad de Ciencias de la  
12 Vida, Universidad Andrés Bello, 8320000, Santiago, Chile.

13

14 **Key words:** *Vibrio parahaemolyticus*, NleH, VPA1328, VopG, T3SS2, T3SS, Type III  
15 Secretion System, foodborne pathogen.

16

17

18 \*Corresponding author. [carlos.blondel@unab.cl](mailto:carlos.blondel@unab.cl)

19 Mailing address, Instituto de Ciencias Biomédicas, Universidad Andrés Bello. Echaurren  
20 183, Santiago, 8320000, Chile.

21 **ABSTRACT**

22 *Vibrio parahaemolyticus* is a marine Gram-negative bacterium that is a leading cause of  
23 seafood-borne gastroenteritis. Pandemic strains of *V. parahaemolyticus* rely on a  
24 specialized protein secretion machinery known as the type III secretion system 2  
25 (T3SS2) to cause disease. The T3SS2 mediates the delivery of 10 known effector  
26 proteins into the cytosol of infected cells, where they subvert multiple cellular pathways.  
27 Here, we identify a new T3SS2 effector protein encoded by VPA1328 (VP\_RS21530) in  
28 *V. parahaemolyticus* strain RIMD2210633. Bioinformatic analysis revealed that  
29 VPA1328 is part of a larger family of uncharacterized T3SS effector proteins with  
30 homology to the VopG effector protein in *V. cholerae* AM-19226. These VopG-like  
31 proteins are found in many but not all T3SS2 gene clusters and are distributed among  
32 diverse vibrio species including *V. parahaemolyticus*, *V. cholerae*, *V. mimicus*, and *V.*  
33 *diabolicus* and also in *Shewanella baltica*. Three clades of VopG sequences were  
34 identified by phylogenetic analysis, but these clades did not correspond to T3SS2  
35 phlotypes, suggesting that *vopG* genes and T3SS2 clusters are evolving somewhat  
36 independently. Structure-based prediction analyses uncovered the presence of a  
37 conserved C-terminal kinase domain in VopG orthologs that is similar to the  
38 serine/threonine kinase domain found in the NleH family of T3SS effector proteins. The  
39 presence of this conserved kinase domain suggests that VopG effector proteins  
40 correspond to a new family of serine/threonine kinases included in the T3SS2 effector  
41 armamentarium.

42

43

44

45

46

47

48 **IMPORTANCE**

49 *Vibrio parahaemolyticus* is the leading bacterial cause of seafood-borne  
50 gastroenteritis worldwide. The pathogen relies on a type III secretion system to deliver a  
51 variety of effector proteins into the cytosol of infected cells to subvert cellular function. In  
52 this study, we identified a novel *Vibrio parahaemolyticus* effector protein that is similar to  
53 the VopG effector of *Vibrio cholerae*. VopG-like effectors were found in diverse vibrio  
54 species and contain a conserved serine/threonine kinase domain that bears similarity to  
55 the kinase domain in the EHEC and Shigella NleH effectors that manipulate the NF- $\kappa$ B  
56 signaling pathway. Together our findings identify a new family of vibrio effector proteins  
57 and highlight the role of horizontal gene transfer events among marine bacteria in  
58 shaping T3SS gene clusters.

## 59 INTRODUCTION

60 *Vibrio parahaemolyticus* is a marine Gram-negative bacterium that is the leading  
61 bacterial cause of seafood-borne gastroenteritis worldwide (1). In 1996, a new clonal *V.*  
62 *parahaemolyticus* strain of the O3:K6 serotype, now known as the pandemic clone,  
63 emerged and has been responsible for major outbreaks of gastroenteritis in diverse  
64 locations around the globe (2).

65 In addition to the presence of the characterized virulence factors thermostable  
66 direct hemolysin (TDH) and the *tdh*-related hemolysin (TRH), genome sequencing  
67 revealed that all *V. parahaemolyticus* strains encode a type III secretion system on  
68 chromosome 1 (T3SS1)(3). Furthermore, strains related to the pandemic clone harbor  
69 an evolutionarily distinct T3SS known as T3SS2 (4–6) encoded within an 80kb *Vibrio*  
70 *parahaemolyticus* pathogenicity island 7 (VPal-7) on chromosome 2 (3). T3SSs are  
71 multicomponent nanomachines that enable Gram-negative bacteria to deliver proteins  
72 known as effectors directly from the bacterial cytosol into the cytosol of eukaryotic cells.  
73 Translocation of effectors into host cells enables pathogens to hijack host-cell signaling,  
74 thereby manipulating a variety of host cell functions (reviewed in (7)). Indeed, the  
75 virulence of many human, animal, and plant pathogens depends on the activity of the  
76 T3SS injectisome and the repertoire of effector proteins delivered to their respective  
77 hosts' cells (8, 9).

78 Notably, most *V. parahaemolyticus* strains isolated from human clinical samples  
79 harbor T3SS2 and studies in animal models have shown that T3SS2 is essential for *V.*  
80 *parahaemolyticus* to colonize the intestine and to cause enteritis and diarrhea (10–12).  
81 Therefore, T3SS2 is considered a key *V. parahaemolyticus* virulence factor. Several  
82 T3SS2 related gene clusters have been identified in other *Vibrio* species and are  
83 referred to as T3SS2 phylotypes (T3SS2 $\alpha$ , T3SS2 $\beta$  and T3SS2 $\gamma$ ) (13). T3SS2 $\alpha$  include  
84 T3SS2 gene clusters related to those found in the *tdh*-positive *V. parahaemolyticus*



85 pandemic strain RIMD2210633 and in *V. cholerae* strain AM-19226. T3SS2 $\beta$  include  
86 T3SS2 gene clusters related to those found in *V. parahaemolyticus* strain TH3996 and  
87 *V. cholerae* strain 1587 (14). Finally, T3SS2 $\gamma$  include T3SS2 gene clusters related to  
88 those encoded in *V. parahaemolyticus* strain MAVP-Q, which has features found in the  
89 T3SS2 $\alpha$  and T3SS2 $\beta$  gene clusters (15).

90 Ten T3SS2 effector proteins in *V. parahaemolyticus* have been identified to date  
91 (VopA, VopT, VopL, VopV, VopC, VopZ, VPA1380, VopO and the recently described  
92 “gatekeepers” VgpA and VgpB) (12, 16–22). These effectors subvert several cellular  
93 pathways including those controlling actin cytoskeleton dynamics and innate  
94 inflammatory responses (reviewed in (23–25)). These ten proteins are classified as  
95 either core or accessory T3SS2 effector proteins based on their distribution among the  
96 T3SS2 phlotypes (13). Notably, the presence of multiple uncharacterized genes in the  
97 VPA1-7 region raises the possibility that there are additional T3SS2 effector proteins yet  
98 to be identified.

99 In this study, we found that VPA1328, an ORF in the *V. parahaemolyticus* VPA1-  
100 7, encodes a novel T3SS2 effector protein. VPA1328, re-named here VopG, due to its  
101 similarity to the uncharacterized *V. cholerae* effector VopG, is secreted in a T3SS2-  
102 dependent fashion. Comparative genomic and phylogenetic analyses revealed that  
103 VPA1328 and VopG are members of a larger family of T3SS2 effector proteins encoded  
104 within the T3SS2 clusters of vibrios outside of *V. parahaemolyticus* and *V. cholerae*  
105 including in *V. mimicus* and *V. diabolicus* and the marine bacterium *Shewanella baltica*.  
106 The association of *vopG* genes with insertion sequence elements in several of these  
107 clusters suggests independent horizontal gene transfer or rearrangement events of  
108 these loci. Furthermore, VopG proteins have a conserved domain that exhibits sequence  
109 and predicted structural similarity to the serine/threonine kinase domain in the well-

110 characterized NleH family of T3SS effector proteins, suggesting a biochemical activity  
111 and potential biological functions for the VopG family of effectors.

112

## 113 RESULTS

114

115 **VPA1328 is a VopG homolog that depends on *Vibrio parahaemolyticus* T3SS2 for**  
116 **its secretion.**

117 We carried out BLASTp-based homology searches of the *V. parahaemolyticus*  
118 VPAl-7 genomic island as a way to identify candidate new T3SS2 effector proteins. This  
119 approach suggested that VPA1328 (VP\_RS21530 in the latest genome annotation of  
120 strain RIMD2210633) is a putative T3SS2 effector protein (**Table S2**). VPA1328 is  
121 predicted to encode a 260 amino acid protein that shares ~42% amino acid sequence  
122 identity with the T3SS effector protein VopG, encoded in the phylogenetically related  
123 T3SS2 in *V. cholerae* AM-19226 (26) (**Fig. 1A and 1B**). The function of VopG remains  
124 unknown, but it is secreted and translocated by the *V. cholerae* T3SS2 and contributes  
125 to host cell cytotoxicity and colonization in a mouse model of infection (26), suggesting  
126 an important role for this effector in virulence (26). Even though VPA1328 and VopG are  
127 located in different locations within their respective T3SS2 clusters, their sequence  
128 similarity and presence in phylogenetically related T3SSs suggests that VPA1328 is a  
129 VopG homolog that functions as a *V. parahaemolyticus* T3SS2 effector protein. Below  
130 we refer to VPA1328 as VopG.

131 Next, we tested if VopG (VPA1328) is secreted and whether its secretion  
132 requires the *V. parahaemolyticus* T3SS2. In these experiments, *V. parahaemolyticus* WT  
133 strain RIMD2210633 and isogenic T3SS1, T3SS2, and T3SS1/T3SS2-deficient mutant  
134 strains ( $\Delta vsn1$ ,  $\Delta vsn2$  and  $\Delta vsn1\Delta vsn2$ , respectively) were grown under conditions  
135 (27) that induce expression of T3SS2 (LB 0.04% bile) (27). To detect VopG, these

136 strains were transformed with pVPA1328-CyA, a plasmid that harbors a translational  
137 fusion between the VPA1328 ORF (VopG) and the adenylate cyclase domain (CyA) of  
138 plasmid pCyA. This construct enables immunoblot detection of VopG in cell lysates and  
139 culture supernatants using anti-CyA antibodies. A VopV-CyA fusion (pVopV-CyA) was  
140 included as a positive control for T3SS2-dependent secretion (19).

141 A band corresponding to the predicted size of the VopG-Cya fusion (~74kDa,  
142 along with some lower molecular weight species likely corresponding to degradation  
143 products) was observed in cell lysates from the WT strain harboring pVPA1328-CyA but  
144 not a control strain harboring the empty vector pCyA (**Fig. 2A**). VopG was only detected  
145 in supernatants when the WT (pVPA1328-CyA) strain was grown under T3SS2 inducing  
146 (LB 0.04% bile), suggesting that its secretion requires T3SS2 activity. Interestingly,  
147 previous transcriptomic analysis showed that expression of VPA1328 was increased by  
148 the presence of bile and controlled by VtrB, the master regulator of T3SS2 expression,  
149 suggesting that it is part of the VtrB regulon (28).

150 Analyses of VopG secretion from  $\Delta vsn1$  (T3SS1-deficient) and  $\Delta vsn2$  (T3SS2-  
151 deficient) strains strongly support the idea that VopG secretion requires T3SS2 and not  
152 T3SS1. When secretion by T3SS1 or T3SS2 or both T3SS was disabled by deletion of  
153 their respective ATPases, there was similar expression of VopG in cell lysates (**Fig. 2B**);  
154 however, VopG was only detected in supernatants from the strain where T3SS1 was  
155 inactivated but not when T3SS2 was inactive. An identical pattern was observed with  
156 VopV, a known T3SS2 substrate (**Fig. 2B**). The cytosolic RNA polymerase beta subunit  
157 (RNAP) was not detected in any of the culture supernatant samples, indicating that  
158 detection of VPA1328 in culture supernatants was not a consequence of bacterial lysis.  
159 Together, these observations demonstrate that VopG is secreted in a T3SS2-dependent  
160 fashion and given its similarity to the *V. cholerae* VopG effector, strongly support the  
161 notion that VopG is a novel *V. parahaemolyticus* T3SS2 effector protein.

162

163 **VopG homologs are widely distributed in vibrios harboring T3SS2 clusters.**

164 The presence of a VopG homolog encoded within the T3SS2 gene cluster in *V.*  
165 *parahaemolyticus* RIMD2210633 prompted us to investigate if additional VopG  
166 homologs are present among distinct T3SS2 phylotypes. The VPA1328 sequence was  
167 used as a query to identify potential VopG homologs by sequential BLASTn, BLASTp  
168 and tBLASTx searches, using publicly available bacterial genome sequences. With cut-  
169 off values of 60% sequence coverage and 40% sequence identity, 2044 candidate VopG  
170 homologs were identified, including 122 non-redundant protein sequences (**Fig. 3A, 3B**  
171 **and Table S3**). The majority of the VopG homologs (86%, n=1764) were encoded in *V.*  
172 *parahaemolyticus* strains and in *V. cholerae* strains (12.5%, n=256), but homologs were  
173 also identified in *V. mimicus* (0.2%, n=5), *V. diabolicus* (0.04%, n=1), *Vibrio sp* (0.5%,  
174 n=11) and in *Shewanella* strains (0.3%, n=7); i.e., in most species known to harbor  
175 T3SS2 gene clusters. Interestingly, a T3SS2 gene cluster was not previously identified in  
176 *V. diabolicus*, a marine organism. However, it is important to note that not all vibrio  
177 species, e.g., *Vibrio anguillarum* (29) which harbor T3SS2 gene clusters, encode VopG  
178 homologs. Thus, even though VopG is widely distributed, this putative effector protein is  
179 not a universal component of the T3SS2.

180 Next, we evaluated the sequence relatedness of VopG homologs using  
181 phylogenetic analysis of the 122 non-redundant VopG sequences. Notably, three distinct  
182 clades (A, B and C) of VopG proteins were identified (**Fig. 3C**). No correlation was found  
183 between these clades and T3SS2 phylotypes. For example, the VopG homologs of *V.*  
184 *cholerae* strain AM-19226 and *V. parahaemolyticus* RIMD2210633 (VPA1328) clustered  
185 in different clades (B and A, respectively) despite the fact that both these T3SS2 belong  
186 to the T3SS2 $\alpha$  phylotype. The lack of correlation between the VopG clades and T3SS2

187 phlotypes suggests that VopG effectors have to some extent evolved independently of  
188 the T3SS2 machinery that delivers them to host cells.

189 Comparative genomic analyses were carried out to gain insights into variation of  
190 the genomic contexts of *vopG* genes within different T3SS2 gene clusters. Genome  
191 sequences from representatives of each clade of the VopG phylogenetic tree, including  
192 at least one genome for each different *Vibrio* species were used for these comparisons.  
193 As shown in **Fig. 4**, the overall genetic structure of these T3SS2 gene clusters is highly  
194 conserved, particularly in the regions encoding structural components of the T3SS2  
195 apparatus. In most T3SS2 gene clusters the relative position of *vopG* was similar with  
196 the exception of *V. parahaemolyticus* RIMD2210633. However, the nucleotide  
197 sequences and ORFs that are adjacent to the *vopG* homologs differed in most of the 7  
198 clusters analyzed in Fig 4. In several of these cases, *vopG* was found to be close to  
199 sequences with similarity to insertion sequence (IS) elements. This association raises  
200 the possibility that IS can promote the mobility of *vopG* loci and potentially account for  
201 the variations in the genetic contexts of these loci within different T3SS2 gene clusters.

202 Consistent with this idea, we identified two *vopG* homologs (FORC14\_RS05860  
203 and FORC14\_RS06170) encoded in the T3SS2 gene cluster of *V. parahaemolyticus*  
204 strain FORC014. Analysis of their respective genetic contexts revealed that one of these  
205 *vopG* genes (FORC14\_RS05860) is located at the end of the T3SS gene cluster and is  
206 flanked by IS200-like mobile genetic elements (**Fig. S1A**). These elements have high  
207 sequence identity to the ISVpa3 insertion sequence. ISVpa3 is an insertion sequence  
208 located adjacent to each copy of the TDH gene in *V. parahaemolyticus* strain  
209 RIMD2210633 and linked in some strains to deletion of TDH (30). While the T3SS2 gene  
210 cluster of *V. parahaemolyticus* RIMD2210633 has 3 copies of these ISVpa3 elements, *V.*  
211 *parahaemolyticus* strain FORC014 has 6 of these elements, 2 of them flanking one of  
212 the *vopG* homologs at the end of the cluster (**Fig. S1B**). Sequence analysis showed that

213 the 2 *vopG* homologs in strain FORC014 share 69% nucleotide identity (**Fig. S2**). Both  
214 the sequence divergence of these 2 *vopG* genes and the mobile genetic elements  
215 flanking FORC14\_RS05860 suggest that this *vopG* homolog was independently  
216 acquired, potentially via a horizontal gene transfer event, and not a duplication of  
217 FORC14\_RS06170.

218 While the presence of a T3SS2 gene cluster in *Shewanella baltica* species has  
219 been inferred due to the presence of the *vscn2* gene in strain *Shewanella baltica* BA175  
220 and *Shewanella baltica* OS183 (31), information regarding the distribution and genetic  
221 context of the T3SS2 gene cluster in this genus has not been reported. We found that  
222 the *Shewanella* T3SS2 is located within a genomic island inserted between the  
223 SBAL678\_RS45345 and SBAL678\_RS45350 ORFs of reference strain OS678 (**Fig.**  
224 **S1B**). This genomic island includes 45 ORFs. The majority of these genes encode  
225 structural components of the T3SS2 apparatus. Interestingly, not every T3SS2 gene  
226 cluster identified in *Shewanella* harbors a VopG-encoding gene (**Fig. S1B**).

227

## 228 **VopG proteins have sequence and predicted structural similarity to the NleH** 229 **family of serine/threonine kinases**

230 The amino acid sequence conservation of the 122 VopG homologs was analyzed  
231 and depicted using WebLogo. The analysis showed a particularly striking conservation in  
232 the C-termini of these amino acid sequences (**Fig. S3**), suggesting that this region of  
233 VopG includes a functional domain. To gain clues regarding the function of VopG  
234 proteins, we used the structure-based homology tools HHpred (32) and  
235 pGenTHREADER (33). For these analyses, the amino acid sequence of *V.*  
236 *parahaemolyticus* VPA1328 was used as a representative of the VopG family of  
237 effectors. Both of these algorithms detected a region in the VopG C-terminus with  
238 similarity to NleH effectors, e.g., HHpred analysis uncovered the presence of a region of

239 22 amino acids in VPA1328 (position 190-212) with identity to the T3SS effector proteins  
240 NleH1 from *Escherichia coli* O157:H7 strain Sakai (PDB: 4LRJ\_B) and OspG from  
241 *Shigella flexneri* strain 301 (PDB: 4Q5E\_A).

242 NleH1 and OspG are members of the NleH of family of T3SS effectors (34–36).  
243 These proteins are translocated by the T3SSs of different bacterial species and act as  
244 serine/threonine kinases in host cells (35). There are 6 members of this family of effector  
245 proteins, including the NleH1 and NleH2 proteins of *E. coli* O157:H7 str. Sakai, OspG  
246 from *Shigella flexneri* strain 301, NleH of *Citrobacter rodentium* strain DBS100, SboH of  
247 *Salmonella bongori* NCTC 12419 and YspK of *Yersinia enterocolitica* strain 8081 (37–  
248 42). The serine/threonine kinase domain of these effectors is distantly related to  
249 eukaryotic regulatory kinases; moreover, functional studies have suggested that each of  
250 these effectors perturbs the NF- $\kappa$ b pathway and inhibits apoptosis in infected host cells  
251 (37, 42, 43).

252 Multiple sequence alignment of representatives of the NleH and VopG family of  
253 T3SS effector proteins were carried out to gain further insight into their similarity.  
254 Representatives from each clade of VopG proteins were included in these analyses. The  
255 analysis showed that the greatest similarity between VopG and NleH proteins is found in  
256 their C-termini in the region that includes the characterized NleH serine/threonine kinase  
257 domain; in contrast, their N-termini differ in both length and sequence (**Fig. 5A and Fig**  
258 **S4**). VopG proteins contain all the critical amino acid residues and motifs important for  
259 kinase activity, including the conserved catalytic residues glycine of the G-rich loop, the  
260 aspartic acid (D) and the asparagine (N) of the catalytic loop (alignment position 200–  
261 205 in VPA1328) and the PID motif of the activation loop (alignment position 220–233 in  
262 VPA1328). In addition, VopG proteins also share the invariant lysine (alignment position  
263 109) involved in the autophosphorylation of the NleH family, and which has been used  
264 as a proxy to measure kinase activity (43) (**Fig. 5A and 5B**). Thus, VopG family effector



265 proteins harbor a NleH-like C-terminal serine/threonine kinase domain. Phylogenetic  
266 analysis of bacterial serine/threonine kinase domains also revealed the similarity of the  
267 kinase domains of VopG and NleH proteins (**Fig. 6A**). The VopG proteins clustered  
268 closer to the NleH proteins on this tree than to non-NleH serine threonine kinases from  
269 *Legionella pneumophila*, *Yersinia pestis*, and *Salmonella enterica*.

270 We derived a 3D structural model of the C-terminal domain of VPA1328 using  
271 comparative homology modeling with I-TASSER (44) to gain further insight into the  
272 serine/threonine kinase domain of VopG proteins. In accord with the HHPred and  
273 pGenTHREADER analyses, I-TASSER identified NleH1, NleH2 and OspG as suitable  
274 models for comparative homology models using the crystal structures available for these  
275 proteins. Five models were obtained, and model 1 was chosen based on its error  
276 estimation, TM-score and RMSD values (**Fig. S5**). As shown in **Fig. 6B**, this model  
277 revealed the remarkable similarity of the predicted structure of the VPA1328 kinase  
278 domain with the NleH kinase domain. The structure of the catalytic pocket, including the  
279 positions of the predicted catalytic amino acid side chains (K109, D201 and N205) in  
280 VPA1328 and OspG structure overlap (**Fig. 6B**), strongly supporting the notion that the  
281 VopG family of proteins encode a NleH-like serine/threonine kinase domain.



## 282 **DISCUSSION**

283           While all *Vibrio parahaemolyticus* strains harbor a T3SS1, a hallmark of the  
284 pandemic *Vibrio parahaemolyticus* O3:K6 clone and most human clinical *Vibrio*  
285 *parahaemolyticus* isolates is the presence of a second and phylogenetically distinct  
286 T3SS2. The latter T3SS is essential for both intestinal colonization and virulence in  
287 some animal models of disease (10, 12). Here, we found that a T3SS2 ORF (VPA1328)  
288 likely corresponds to a novel *V. parahaemolyticus* T3SS2 effector protein. This ORF,  
289 which is secreted in a T3SS2-dependent fashion, bears similarity to the VopG effector  
290 found in the *V. cholerae* AM-19226 T3SS2. The function of the latter VopG protein is  
291 unknown, but it has been shown to be translocated to host cells and linked to *V.*  
292 *cholerae* AM-19226's pathogenicity. Bioinformatic analyses uncovered 122 non-  
293 redundant VopG-like proteins encoded in all 3 phylotypes of T3SS2 clusters in diverse  
294 vibrio species and in *S. baltica*. Interestingly, the evolutionary history of the T3SS2  
295 phylotypes does not appear to correspond with the evolution of the 3 clades of VopG  
296 proteins that were uncovered by phylogenetic analysis. We found that the highly  
297 conserved C-terminal domains of VopG proteins bear striking structural similarity to the  
298 serine/threonine kinase domain of the NleH family of effectors found in enteric  
299 pathogens such as EHEC and Shigella (OspG). Thus, our findings support the idea that  
300 VopG effectors function as serine/threonine kinases in host cells.

301           The *V. cholerae* AM-19226 effector VopG had been classified as a *V. cholerae*  
302 specific T3SS effector (26, 45) but our analyses showed that VopG homologs belong to  
303 a larger family of putative effector proteins that is widely distributed among *Vibrio*  
304 species including *V. parahaemolyticus*, *V. cholerae*, *V. mimicus* and *V. diabolicus* as well  
305 as in strains of *Shewanella baltica*. Recently, Matsuda et al proposed to classify T3SS2  
306 effectors proteins as “core” effectors if they are conserved in both *V. parahaemolyticus*  
307 and non-O1/non-O139 *V. cholerae* (13) and as “accessory” effectors (13) if they are not.

308 According to this classification, our work suggests that VopG corresponds to a core  
309 effector protein due to its presence in multiple vibrio species. However, VopG homologs  
310 are not present in the T3SS2 gene clusters identified in all vibrio species; e.g, the T3SS2  
311 cluster in *Vibrio anguillarum* (29) lack a VopG homolog and not all clusters in *Vibrio*  
312 *mimicus* (46) encode a recognizable VopG.

313 T3SS2 gene clusters are classified into three phylotypes (T3SS2 $\alpha$ , T3SS2 $\beta$  and  
314 T3SS2 $\gamma$ ) that are believed to have been acquired through horizontal gene transfer  
315 events (13, 15, 46). Even though VopG homologs are not universally found in all T3SS2  
316 gene clusters, we identified VopG homologs in all three T3SS2 phylotypes. Phylogenetic  
317 analysis identified three distinct VopG clades (**Fig. 3C**). These VopG clades did not  
318 correlate with T3SS2 phylotypes; i. e., all three clades were found in each T3SS2  
319 phylotype. The apparent independent evolution of T3SS2 phylotypes and VopG clades  
320 supports the possibility that *vopG* genes have been independently acquired by different  
321 T3SS2 lineages.

322 The absence of *vopG* genes from certain T3SS2 clusters could be explained  
323 either by loss of *vopG* loci due to deletion event(s) or independent acquisition of *vopG* in  
324 some T3SS2 clusters. The presence of a second *vopG* homolog flanked by IS elements  
325 in *V. parahaemolyticus* strain FORC014 suggests insertion sequences may play a role in  
326 mobilizing *vopG* genes. These sequences bear similarity to the ISVpa3 insertion  
327 sequence first described in *V. parahaemolyticus* RIMD2210633 (30). Since insertion  
328 sequences have been shown to shape bacterial genomic islands through  
329 rearrangements, insertion and deletion events, it is plausible that ISVpa3-like elements  
330 have shaped the evolution of T3SS2 gene clusters through similar mechanisms. The  
331 apparent mobility of *vopG* loci adds an additional layer of complexity to our  
332 understanding of T3SS2 clusters. That is, these clusters appear to have been spread via  
333 horizontal gene transfer events among marine bacteria and their repertoire of effector

334 proteins appears to be “tunable” through independent horizontal gene transfer or  
335 rearrangement events.

336 Analysis of the amino acid sequences of the 122 non-redundant VopG homologs  
337 identified here revealed a particularly high degree of conservation in their C-termini. This  
338 region of VopG proteins was found to be very similar to the conserved serine/threonine  
339 kinase domain in the NleH family of T3SS effector proteins. Thus, the conservation of  
340 this part of VopG effectors is likely explained by the presence of functional kinase  
341 domain. Structural predictions, which showed that VopG proteins contain all the residues  
342 that constitute that catalytic pocket of NleH proteins, strongly support this hypothesis.

343 The NleH family of effectors contain a eukaryotic-like serine/threonine kinase  
344 domain that independently evolved in bacteria (34, 35). VopG homologs harbor each of  
345 the key residues described in the NleH family of protein kinases. The classification of the  
346 NleH proteins as a distinct bacterial kinase family was made through structure-based  
347 phylogenetic analysis (34). Phylogenetic analysis showed that the C-termini of VopG  
348 proteins have more similarity to the kinase domain of NleH proteins than to other  
349 bacterial protein kinases (**Fig. 6A**), but further structural information is required to  
350 determine if VopG proteins are novel members of the NleH family or represent a distinct  
351 family on their own.

352 Although the conservation of key catalytic residues in VopG and NleH proteins  
353 provides evidence that supports the notion that VopG proteins are functional  
354 serine/threonine kinases, it is more problematic to speculate that their biological function  
355 is conserved as well. To date, NleH proteins have been linked to their ability to perturb  
356 the NF- $\kappa$ b pathway and impact cellular survival during infection through different  
357 molecular mechanisms (37, 38, 42, 43, 47). Both NleH1 and NleH2 proteins bind the  
358 host protein RPS3 leading to inhibition or activation of the NF- $\kappa$ b pathway respectively  
359 (42, 48). Despite these apparently different effects on the NF- $\kappa$ b pathway, both were

360 shown to inhibit apoptosis through interaction with the Bax Inhibitor 1 protein (43). The  
361 *Shigella* OspG protein can inhibit the NF- $\kappa$ b pathway by inhibiting the proteasomal  
362 destruction of I $\kappa$ B $\alpha$  (40) and the SboH protein of *Salmonella bongori* blocks intrinsic  
363 apoptotic pathways (37). It will be interesting to test whether VopG proteins also perturb  
364 the NF- $\kappa$ b pathway. Furthermore, the N-terminal region of NleH proteins has been linked  
365 to substrate recognition and the observed functional differences between the NleH1 and  
366 NleH2 proteins (34, 38, 42). In this context, the sequence divergence observed within  
367 the N-terminal region of VopG homologs (**Fig. S3 and S4**) may have functional  
368 implications.

369 In summary, our work identifies a new family of VopG proteins that are likely  
370 T3SS2 effectors. These proteins contain a distinctive NleH-like serine/threonine kinase  
371 domain. Future biochemical and structural studies are required to corroborate these  
372 predictions. Moreover, defining the role(s) of these effectors in the pathogenicity and/or  
373 environmental adaptation of the diverse *Vibrio* and *Shewanella* species that encode  
374 them will be fruitful.

375 **MATERIALS AND METHODS**

376

377 **Bacterial strains and growth conditions.**

378 All bacterial strains and plasmids used in this study are listed in **Table S1**. *V.*  
379 *parahaemolyticus* RIMD2210633 (3) and its  $\Delta vscN1$ ,  $\Delta vscN2$  and  $\Delta vscN1 \Delta vscN2$   
380 derivatives (19) were used in this study. Bacterial strains were routinely cultured in LB  
381 medium or on LB agar plates at 37°C. Culture media was supplemented with the  
382 following antibiotics and chemicals: 0.04% bovine and ovine bile (Sigma Cat No. B8381);  
383 100µg/ml ampicillin, 5µg/ml and 20µg/ml chloramphenicol for *V. parahaemolyticus* and  
384 *E. coli* strains, respectively; 1ug/ml IPTG to induce expression vector pCYA.

385

386 **T3SS secretion assays**

387 To determine if VPA1328 was secreted in a T3SS2-dependent fashion, a reporter fusion  
388 was constructed between VPA1328 and the CyA reporter encoded in plasmid pCyA (a  
389 pMMB207 derivative) (**49**) generating plasmid pVPA1328-CyA. As a positive control for  
390 T3SS2-dependent secretion, a VopV-CyA fusion was used (pVopV-CyA) (**19**). As a  
391 negative control, the empty plasmid pCyA was used. Each plasmid was transformed  
392 into *V. parahaemolyticus* strains by electroporation as previously described (**19**).  
393 Secretion assays were performed by growing each *V. parahaemolyticus* strain for 1.5 h  
394 in LB medium supplemented with 0.04% bile. When cultures reached an OD<sub>600nm</sub> of  
395 0.6, 1mM IPTG was added to induce expression of the CyA reporter constructs. After 1.5  
396 h, culture supernatants were collected by centrifugation at 6000 RPM for 20 min, filtered  
397 sterilized through a 0.22-µm filter and concentrated 50-70-fold by filtration with an  
398 Amicon Ultra-15 Centrifugal Filter Unit (Millipore) with a 10 kDa molecular weight cut-off.  
399 Prior to concentrating the culture supernatant, BSA (1□mg/ml) was added to serve as a  
400 concentration/loading control. Whole-cell lysates were prepared by solubilizing the

401 bacterial pellet in 1X Laemmli buffer. Lysate and supernatant samples were processed  
402 for SDS-PAGE analysis by mixing them with loading buffer, boiling for 5 min, and run on  
403 10% SDS-PAGE gels. For immunoblot analysis, gels were transferred to PVDF  
404 membranes. The Pierce Coomassie Plus (Bradford) Assay Kit (Thermo Fisher Cat No.  
405 23236) was used for determination of protein concentrations. Antibodies were used at  
406 the following dilutions: anti-CyA (rabbit polyclonal, 1:2,000), anti-RNA polymerase  
407 (mouse monoclonal, 1:2,000; Santa Cruz Biotechnology Cat. No. Sc-101597), goat anti-  
408 mouse IgG-HRP (1:10,000; Santa Cruz Biotechnology Cat No. sc-2031) and goat anti-  
409 Rabbit IgG (H+L) Secondary Antibody, HRP (1:10,000; Thermo Cat No.31460). The  
410 blots were developed with SuperSignal West Pico ECL substrate (Thermo Fisher Cat  
411 No. 35060) and imaging was performed on a C-DiGit Blot Scanner (LI-COR  
412 Biosciences). All blots are representative of at least 3 biological replicates.

413

#### 414 **Sequence and phylogenetic analysis**

415 Identification of VopG orthologs was carried out using the VPA1328 amino acid  
416 and nucleotide sequences as queries in BLASTp, BLASTn, BLASTx, tBLASTn and  
417 tBLASTx analyses using publicly available bacterial genome sequences of the NCBI  
418 database (December 2020). A 94% sequence length, 40% identity and 60% sequence  
419 coverage threshold were used to select positive matches. Sequence conservation was  
420 analyzed by multiple sequence alignments using MAFFT (50) and T-Coffee Expresso  
421 (51) and visualized by ESPript 3 (52). WebLogo analysis was performed using multiple  
422 sequence alignments (53). Comparative genomic analysis of the T3SS2 gene clusters  
423 was performed using the multiple aligner Mauve (54) and the IslandViewer 4 pipeline  
424 (55) and EasyFig v2.2.2. Nucleotide sequences were analyzed by the sequence  
425 visualization and annotation tool Artemis version 18.1 (56). Multiple sequence  
426 alignments were used for phylogenetic analyses that were performed with the Molecular

427 Evolutionary Genetics Analysis (MEGA) software version 7.0 (57) and visualized by  
428 iTOL (58). Phylogenetic trees were built from the alignments by the bootstrap test of  
429 phylogeny (2000 replications) using the neighbor-joining (NJ) method with a Jones-  
430 Taylor-Thornton (JTT) correction model.

431

#### 432 **Remote homology prediction and homology modeling**

433 Remote homology prediction of VPA1328 was performed using HHpred (32) and  
434 pGENTHREADER (33) on the PSIPRED server (59). Protein structure models of the  
435 VPA1328 C-terminal domain were obtained using I-TASSER (44), a protein  
436 structure homology-modelling server. Protein structure visualization and template  
437 alignment and superposition were performed using MAESTRO (60).

438 **ACKNOWLEDGMENTS**

439

440 We thank members of the Blondel Laboratory for helpful discussions on all aspects of  
441 this project and for their comments on the manuscript.

442

443 **AUTHOR CONTRIBUTIONS**

444 Nicolas Plaza: Conceptualization, Methodology, Formal analysis, Investigation,  
445 Visualization, Data curation, Writing-Original Draft and review and editing.

446

447 Katherine Garcia: Conceptualization, review and editing final manuscript.

448

449 Matthew K. Waldor: Conceptualization, Resources, Writing - Review and editing.

450

451 Carlos J Blondel: Conceptualization, Methodology, Formal analysis, Investigation,  
452 Visualization, Resources, Data curation, Writing - Review and editing, Funding  
453 acquisition, Supervision and Project administration.

454

455 **CONFLICT OF INTERESTS**

456 The authors declare that there are no conflicts of interest.

457

458 **FUNDING INFORMATION**

459 This work was funded by the Howard Hughes Medical Institute (HHMI)-Gulbenkian  
460 International Research Scholar Grant #55008749, FONDECYT Grant 1201805 (ANID)  
461 and REDI170269 (ANID) to CJB. KG is supported by FONDECYT Grant 1190957



462 (ANID). MKW is a Howard Hughes Medical Institute (HHMI) Investigator and is  
463 supported by NIAID grant R01-AI-043247.

464 **REFERENCES**

465

466 1. Letchumanan V, Chan K-G, Lee L-H. 2014. *Vibrio parahaemolyticus*: a review on the  
467 pathogenesis, prevalence, and advance molecular identification techniques. *Frontiers in*  
468 *microbiology* 5:705.

469 2. Velazquez-Roman J, León-Sicairos N, Hernández-Díaz L de J, Canizalez-Roman A.  
470 2013. Pandemic *Vibrio parahaemolyticus* O3:K6 on the American continent. *Frontiers in*  
471 *cellular and infection microbiology* 3:110.

472 3. Makino K, Oshima K, Kurokawa K, Yokoyama K, Uda T, Tagomori K, Iijima Y, Najima  
473 M, Nakano M, Yamashita A, Kubota Y, Kimura S, Yasunaga T, Honda T, Shinagawa H,  
474 Hattori M, Iida T. 2003. Genome sequence of *Vibrio parahaemolyticus*: a pathogenic  
475 mechanism distinct from that of *V. cholerae*. *Lancet* 361:743–749.

476 4. Hazen TH, Lafon PC, Garrett NM, Lowe TM, Silberger DJ, Rowe LA, Frace M,  
477 Parsons MB, Bopp CA, Rasko DA, Sobecky PA. 2015. Insights into the environmental  
478 reservoir of pathogenic *Vibrio parahaemolyticus* using comparative genomics. *Frontiers*  
479 *in microbiology* 6:204.

480 5. Abby SS, Rocha EPC. 2012. The non-flagellar type III secretion system evolved from  
481 the bacterial flagellum and diversified into host-cell adapted systems. *PLoS genetics*  
482 8:e1002983.

483 6. Park K-S, Ono T, Rokuda M, Jang M-H, Okada K, Iida T, Honda T. 2004. Functional  
484 characterization of two type III secretion systems of *Vibrio parahaemolyticus*. *Infection*  
485 *and immunity* 72:6659–6665.

486 7. Portaliou AG, Tsolis KC, Loos MS, Zorzini V, Economou A. 2016. Type III Secretion:  
487 Building and Operating a Remarkable Nanomachine. *Trends in biochemical sciences*  
488 41:175–189.

489 8. Lara-Tejero M, Galán JE. 2019. Protein Secretion in Bacteria. *Ecosal Plus* 8:245–259.

490 9. Galán JE, Lara-Tejero M, Marlovits TC, Wagner S. 2014. Bacterial Type III Secretion  
491 Systems: Specialized Nanomachines for Protein Delivery into Target Cells. *Annu Rev*  
492 *Microbiol* 68:1–24.

493 10. Hubbard TP, Chao MC, Abel S, Blondel CJ, Wiesch PAZ, Zhou X, Davis BM, Waldor  
494 MK. 2016. Genetic analysis of *Vibrio parahaemolyticus* intestinal colonization. *Proc*  
495 *National Acad Sci* 113:201601718.

496 11. Piñeyro P, Zhou X, Orfe LH, Friel PJ, Lahmers K, Call DR. 2010. Development of  
497 two animal models to study the function of *Vibrio parahaemolyticus* type III secretion  
498 systems. *Infection and immunity* 78:4551–4559.

- 499 12. Ritchie JM, Rui H, Zhou X, Iida T, Kodama T, Ito S, Davis BM, Bronson RT, Waldor  
500 MK. 2012. Inflammation and disintegration of intestinal villi in an experimental model for  
501 *Vibrio parahaemolyticus*-induced diarrhea. *PLoS pathogens* 8:e1002593.
- 502 13. Matsuda S, Hiyoshi H, Tandhavanant S, Kodama T. 2020. Advances on *Vibrio*  
503 *parahaemolyticus* research in the postgenomic era. *Microbiol Immunol* 64:167–181.
- 504 14. Okada N, Iida T, Park K-S, Goto N, Yasunaga T, Hiyoshi H, Matsuda S, Kodama T,  
505 Honda T. 2009. Identification and characterization of a novel type III secretion system in  
506 trh-positive *Vibrio parahaemolyticus* strain TH3996 reveal genetic lineage and diversity  
507 of pathogenic machinery beyond the species level. *Infection and immunity* 77:904–913.
- 508 15. Xu F, Gonzalez-Escalona N, Drees KP, Sebra RP, Cooper VS, Jones SH, Whistler  
509 CA. 2017. Parallel Evolution of Two Clades of an Atlantic-Endemic Pathogenic Lineage  
510 of *Vibrio parahaemolyticus* by Independent Acquisition of Related Pathogenicity Islands.  
511 *Appl Environ Microb* 83:e01168-17.
- 512 16. Hiyoshi H, Okada R, Matsuda S, Gotoh K, Akeda Y, Iida T, Kodama T. 2015.  
513 Interaction between the Type III Effector VopO and GEF-H1 Activates the RhoA-ROCK  
514 Pathway. *Plos Pathog* 11:e1004694.
- 515 17. Hiyoshi H, Kodama T, Saito K, Gotoh K, Matsuda S, Akeda Y, Honda T, Iida T.  
516 2011. VopV, an F-Actin-Binding Type III Secretion Effector, Is Required for *Vibrio*  
517 *parahaemolyticus*-Induced Enterotoxicity. *Cell Host Microbe* 10:401–409.
- 518 18. Kodama T, Rokuda M, Park K-S, Cantarelli VV, Matsuda S, Iida T, Honda T. 2007.  
519 Identification and characterization of VopT, a novel ADP-ribosyltransferase effector  
520 protein secreted via the *Vibrio parahaemolyticus* type III secretion system 2. *Cellular*  
521 *Microbiology* 9:2598–2609.
- 522 19. Zhou X, Gewurz BE, Ritchie JM, Takasaki K, Greenfeld H, Kieff E, Davis BM, Waldor  
523 MK. 2013. A *Vibrio parahaemolyticus* T3SS effector mediates pathogenesis by  
524 independently enabling intestinal colonization and inhibiting TAK1 activation. *Cell reports*  
525 3:1690–1702.
- 526 20. Zhang L, Krachler AM, Broberg CA, Li Y, Mirzaei H, Gilpin CJ, Orth K. 2012. Type III  
527 effector VopC mediates invasion for *Vibrio* species. *Cell reports* 1:453–460.
- 528 21. Trosky JE, Mukherjee S, Burdette DL, Roberts M, McCarter L, Siegel RM, Orth K.  
529 2004. Inhibition of MAPK Signaling Pathways by VopA from *Vibrio parahaemolyticus*. *J*  
530 *Biol Chem* 279:51953–51957.
- 531 22. Tandhavanant S, Matsuda S, Hiyoshi H, Iida T, Kodama T. 2018. *Vibrio*  
532 *parahaemolyticus* Senses Intracellular K<sup>+</sup> To Translocate Type III Secretion System 2  
533 Effectors Effectively. *Mbio* 9:e01366-18.
- 534 23. Matsuda S, Hiyoshi H, Tandhavanant S, Kodama T. 2020. Advances on *Vibrio*  
535 *parahaemolyticus* research in the postgenomic era. *Microbiol Immunol* 64:167–181.

- 536 24. Lingzhi L, Meng H, Dan G, Yang L, Mengdie J. 2019. Molecular mechanisms of  
537 *Vibrio parahaemolyticus* pathogenesis. *Microbiol Res* 222:43–51.
- 538 25. O’Boyle N, Boyd A. 2014. Manipulation of intestinal epithelial cell function by the cell  
539 contact-dependent type III secretion systems of *Vibrio parahaemolyticus*. *Frontiers in*  
540 *cellular and infection microbiology* 3:114.
- 541 26. Chaand M, Miller KA, Sofia MK, Schlesener C, Weaver JWA, Sood V, Dziejman M.  
542 2015. Type Three Secretion System Island-Encoded Proteins Required for Colonization  
543 by Non-O1/Non-O139 Serogroup *Vibrio cholerae*. *Infect Immun* 83:2862–2869.
- 544 27. Gotoh K, Kodama T, Hiyoshi H, Izutsu K, Park K-S, Dryselius R, Akeda Y, Honda T,  
545 Iida T. 2010. Bile acid-induced virulence gene expression of *Vibrio parahaemolyticus*  
546 reveals a novel therapeutic potential for bile acid sequestrants. *PloS one* 5:e13365.
- 547 28. Livny J, Zhou X, Mandlik A, Hubbard T, Davis BM, Waldor MK. 2014. Comparative  
548 RNA-Seq based dissection of the regulatory networks and environmental stimuli  
549 underlying *Vibrio parahaemolyticus* gene expression during infection. *Nucleic Acids Res*  
550 42:12212–12223.
- 551 29. Naka H, Dias GM, Thompson CC, Dubay C, Thompson FL, Crosa JH. 2011.  
552 Complete genome sequence of the marine fish pathogen *Vibrio anguillarum* harboring  
553 the pJM1 virulence plasmid and genomic comparison with other virulent strains of *V.*  
554 *anguillarum* and *V. ordalii*. *Infection and immunity* 79:2889–2900.
- 555 30. Kamruzzaman M, Bhoopong P, Vuddhakul V, Nishibuchi M. 2008. Detection of a  
556 functional insertion sequence responsible for deletion of the thermostable direct  
557 hemolysin gene (tdh) in *Vibrio parahaemolyticus*. *Gene* 421:67–73.
- 558 31. Dong X, Li N, Liu Z, Lv X, Shen Y, Li J, Du G, Wang M, Liu L. 2020. CRISPRi-  
559 Guided Multiplexed Fine-Tuning of Metabolic Flux for Enhanced Lacto- N -neotetraose  
560 Production in *Bacillus subtilis*. *J Agr Food Chem* 68:2477–2484.
- 561 32. Zimmermann L, Stephens A, Nam S-Z, Rau D, Kübler J, Lozajic M, Gabler F, Söding  
562 J, Lupas AN, Alva V. 2017. A Completely Reimplemented MPI Bioinformatics Toolkit  
563 with a New HHpred Server at its Core. *J Mol Biol* 430:2237–2243.
- 564 33. Lobley A, Sadowski MI, Jones DT. 2009. pGenTHREADER and pDomTHREADER:  
565 new methods for improved protein fold recognition and superfamily discrimination.  
566 *Bioinformatics* 25:1761–1767.
- 567 34. Grishin AM, Cherney M, Anderson DH, Phanse S, Babu M, Cygler M. 2014. NleH  
568 Defines a New Family of Bacterial Effector Kinases. *Structure* 22:250–259.
- 569 35. Grishin AM, Beyrakhova KA, Cygler M. 2015. Structural insight into effector proteins  
570 of Gram-negative bacterial pathogens that modulate the phosphoproteome of their host.  
571 *Protein Sci* 24:604–620.

- 572 36. Grishin A, Cherney M, Condos T, Barber K, Anderson D, Phanse S, Babu M, Shaw  
573 G, Cygler M. 2014. Bacterial Effector Kinases. *Acta Crystallogr Sect Found Adv*  
574 70:C428–C428.
- 575 37. Fookes M, Schroeder GN, Langridge GC, Blondel CJ, Mammina C, Connor TR,  
576 Seth-Smith H, Vernikos GS, Robinson KS, Sanders M, Petty NK, Kingsley RA, Bäuml  
577 AJ, Nuccio S-P, Contreras I, Santiviago CA, Maskell D, Barrow P, Humphrey T, Nastasi  
578 A, Roberts M, Frankel G, Parkhill J, Dougan G, Thomson NR. 2011. *Salmonella bongori*  
579 provides insights into the evolution of the Salmonellae. *PLoS pathogens* 7:e1002191.
- 580 38. Pham TH, Gao X, Tsai K, Olsen R, Wan F, Hardwidge PR. 2012. Functional  
581 Differences and Interactions between the *Escherichia coli* Type III Secretion System  
582 Effectors NleH1 and NleH2. *Infect Immun* 80:2133–2140.
- 583 39. García-Angulo VA, Deng W, Thomas NA, Finlay BB, Puente JL. 2008. Regulation of  
584 Expression and Secretion of NleH, a New Non-Locus of Enterocyte Effacement-  
585 Encoded Effector in *Citrobacter rodentium*. *J Bacteriol* 190:2388–2399.
- 586 40. Kim DW, Lenzen G, Page A-L, Legrain P, Sansonetti PJ, Parsot C. 2005. The  
587 *Shigella flexneri* effector OspG interferes with innate immune responses by targeting  
588 ubiquitin-conjugating enzymes. *P Natl Acad Sci Usa* 102:14046–14051.
- 589 41. Matsumoto H, Young GM. 2006. Proteomic and functional analysis of the suite of  
590 Ysp proteins exported by the Ysa type III secretion system of *Yersinia enterocolitica*  
591 Biovar 1B. *Mol Microbiol* 59:689–706.
- 592 42. Gao X, Wan F, Mateo K, Callegari E, Wang D, Deng W, Puente J, Li F, Chaussee  
593 MS, Finlay BB, Lenardo MJ, Hardwidge PR. 2009. Bacterial Effector Binding to  
594 Ribosomal Protein S3 Subverts NF- $\kappa$ B Function. *Plos Pathog* 5:e1000708.
- 595 43. Hemrajani C, Berger CN, Robinson KS, Marchès O, Mousnier A, Frankel G. 2010.  
596 NleH effectors interact with Bax inhibitor-1 to block apoptosis during enteropathogenic  
597 *Escherichia coli* infection. *Proc National Acad Sci* 107:3129–3134.
- 598 44. Yang J, Yan R, Roy A, Xu D, Poisson J, Zhang Y. 2015. The I-TASSER Suite:  
599 protein structure and function prediction. *Nat Methods* 12:7–8.
- 600 45. Alam A, Miller KA, Chaand M, Butler JS, Dziejman M. 2011. Identification of *Vibrio*  
601 *cholerae* Type III Secretion System Effector Proteins †. *Infect Immun* 79:1728–1740.
- 602 46. Okada N, Matsuda S, Matsuyama J, Park K-S, Reyes C de los, Kogure K, Honda T,  
603 Iida T. 2010. Presence of genes for type III secretion system 2 in *Vibrio mimicus* strains.  
604 *BMC microbiology* 10:302.
- 605 47. Grishin AM, Barber KR, Gu R-X, Tieleman DP, Shaw GS, Cygler M. 2018.  
606 Regulation of *Shigella* Effector Kinase OspG through Modulation of its Dynamic  
607 Properties. *J Mol Biol* 430:2096–2112.

- 608 48. Pham TH, Gao X, Singh G, Hardwidge PR. 2013. Escherichia coli Virulence Protein  
609 NleH1 Interaction with the v-Crk Sarcoma Virus CT10 Oncogene-like Protein (CRKL)  
610 Governs NleH1 Inhibition of the Ribosomal Protein S3 (RPS3)/Nuclear Factor  $\kappa$ B (NF-  
611  $\kappa$ B) Pathway. *J Biol Chem* 288:34567–34574.
- 612 49. Zhou X, Gewurz BE, Ritchie JM, Takasaki K, Greenfeld H, Kieff E, Davis BM, Waldor  
613 MK. 2013. A *Vibrio parahaemolyticus* T3SS Effector Mediates Pathogenesis by  
614 Independently Enabling Intestinal Colonization and Inhibiting TAK1 Activation. *Cell*  
615 *Reports* 3:1690–1702.
- 616 50. Katoh K, Rozewicki J, Yamada KD. 2017. MAFFT online service: multiple sequence  
617 alignment, interactive sequence choice and visualization. *Brief Bioinform* 20:bbx108-.
- 618 51. Notredame C, Higgins DG, Heringa J. 2000. T-Coffee: A Novel Method for Fast and  
619 Accurate Multiple Sequence Alignment. *JMB* 302:205–217.
- 620 52. Robert X, Gouet P. 2014. Deciphering key features in protein structures with the new  
621 ENDscript server. *Nucleic Acids Res* 42:W320–W324.
- 622 53. Crooks GE, Hon G, Chandonia J-M, Brenner SE. 2004. WebLogo: A Sequence Logo  
623 Generator. *Genome Res* 14:1188–1190.
- 624 54. Darling ACE, Mau B, Blattner FR, Perna NT. 2004. Mauve: Multiple Alignment of  
625 Conserved Genomic Sequence With Rearrangements. *Genome Res* 14:1394–1403.
- 626 55. Bertelli C, Laird MR, Williams KP,  
627 Simon Fraser University Research Computing Group, Lau BY, Hoad G, Winsor GL,  
628 Brinkman FS. 2017. IslandViewer 4: expanded prediction of genomic islands for larger-  
629 scale datasets. *Nucleic Acids Res* 45:W30–W35.
- 630 56. Carver T, Harris SR, Berriman M, Parkhill J, McQuillan JA. 2012. Artemis: an  
631 integrated platform for visualization and analysis of high-throughput sequence-based  
632 experimental data. *Bioinformatics* 28:464–469.
- 633 57. Kumar S, Stecher G, Tamura K. 2016. MEGA7: Molecular Evolutionary Genetics  
634 Analysis Version 7.0 for Bigger Datasets. *Mol Biol Evol* 33:1870–1874.
- 635 58. Letunic I, Bork P. 2019. Interactive Tree Of Life (iTOL) v4: recent updates and new  
636 developments. *Nucleic Acids Res* 47:gkz239-.
- 637 59. Buchan DWA, Jones DT. 2019. The PSIPRED Protein Analysis Workbench: 20  
638 years on. *Nucleic Acids Res* 47:W402–W407.
- 639 60. 2020-4 SR. 2020. MAESTRO. New York.
- 640
- 641

642 **FIGURE LEGENDS**

643

644 **FIG 1.** VPA1328, an ORF in the *V. parahaemolyticus* RIMD2210633 T3SS2 gene  
645 cluster, is similar to the VopG effector protein encoded within the *V. cholerae* AM-19226  
646 T3SS2 gene cluster. (A) Schematic depiction of a comparison of the T3SS2 gene  
647 clusters in *V. parahaemolyticus* RIMD2210633 and *V. cholerae* AM-19226. BLASTn  
648 alignment was performed and visualized using EasyFig. (B) Multiple Sequence  
649 alignment of VPA1328 and VopG homologs. BLASTp alignments were performed using  
650 T-Coffee Espresso and visualized by ESPrpt 3. Amino acids with a red background  
651 correspond to positions with 100% identity, amino acids with a yellow background  
652 correspond to positions with >70% identity.

653

654 **FIG 2.** VPA1328 is secreted in a T3SS2 dependent fashion. Immunoblots of culture  
655 supernatants and whole cell lysates using anti-CyA antibodies for CyA tagged VPA1328  
656 (VopG) and VPA1357 (VopV) in WT (A) and (B) isogenic  $\Delta vscn1$ ,  $\Delta vscn2$  and  
657  $\Delta vscn1\Delta vscn2$  mutant strains. Immunoblots for RNAP was used as a control for cell  
658 lysis.

659

660 **FIG 3.** VopG homologs are widely distributed among *Vibrio* and *Shewanella* species. (A)  
661 Number of *Vibrio* sp and *Shewanella* sp isolates where VopG homologs were identified.  
662 (B) Distribution of the 122 non-redundant VopG protein sequences in different *Vibrio* and  
663 *Shewanella* species. (C) Phylogenetic analysis of the 122 non-redundant VopG  
664 homologs identified in this study. Phylogenetic analysis was performed with MEGA and  
665 visualized by iTOL. Distinct bacterial species are highlighted in different colors. VopG



666 homologs used in the multiple sequence alignment of Fig 5A are highlighted with a black  
667 dot.

668

669 **FIG 4.** Location of *vopG* homologs within T3SS2 gene clusters. BLASTn alignments  
670 were performed and visualized using EasyFig.

671

672 **FIG 5.** Conservation of the C-terminal domains of VopG homologs. (A) Multiple  
673 sequence alignment and Weblogo analysis of the C-terminal domains of VopG proteins  
674 (aminoacids 84-260 in VPA1328) with the serine/threonine kinase domains of NleH  
675 proteins. G-rich, catalytic and activation loops of the kinase are highlighted in colored  
676 boxes matching the schematic diagram in (B). BLASTp alignment was performed using  
677 T-Coffee Espresso and visualized by ESPript 3. Amino acids within a red background  
678 correspond to positions with 100% identity, amino acids with a yellow background  
679 correspond to positions with >70% identity. The secondary structure of NleH1 and OspG  
680 is shown flanking the alignment ( $\alpha$ , alpha helices;  $\beta$ , beta sheets; T, turns). (B)  
681 Schematic representation of VPA1328 highlighting the presence of the T3S signal as  
682 well as conserved regions and key catalytic residues of the putative serine/threonine  
683 kinase domain identified in (A).

684

685 **FIG 6.** VopG contain a NleH-like serine/threonine kinase domain. (A) Phylogenetic  
686 analysis of bacterial serine/threonine kinases. The analysis was performed with MEGA  
687 and visualized by iTOL. (B) Comparative homology model of the C-terminal domain of  
688 VPA1328 (aminoacids 84-260) superimposed on the known structure OspG (PDB  
689 4bvU). The inset depicts the catalytic domain of OspG and the superimposed predicted  
690 structure of this region in VPA1328. Homology modelling was performed using the I-  
691 TASSER pipeline and visualized with MAESTRO.



692

693 **FIG S1.** Genomic context of *vopG* in *Shewanella baltica* BA175 and *V. parahaemolyticus*  
694 FORC014. (A) Schematic of the *vopG* genomic context within T3SS2 gene clusters of  
695 *Shewanella* species and within the T3SS gene cluster of *V. parahaemolyticus* FORC014  
696 (B). BLASTn alignment was performed and visualized using EasyFig.

697

698 **FIG S2.** Multiple sequence alignment of the DNA sequence of the *vopG* homologs  
699 encoded within the T3SS2 gene cluster of *V. parahaemolyticus* strain FORC014.  
700 BLASTn alignment was performed using T-Coffee and visualized by ESPript 3.  
701 Nucleotides within a red background correspond to positions with 100% identity.

702

703 **FIG S3.** Weblogo analysis of the multiple sequence alignment of the 122 non-redundant  
704 VopG proteins identified in this study.

705

706 **FIG S4.** Multiple sequence alignment of the amino acid sequences of the VopG  
707 homologs from *V. parahaemolyticus* RIMD2210633 and *V. cholerae* AM-19226 with the  
708 NleH1, NleH2 proteins of *E. coli* O157:H7 and OspG protein of *S. sonnei* strain Ss046.  
709 BLASTp alignment was performed using M-Coffee and visualized by ESPript 3. Amino  
710 acids within a red background corresponds to positions with 100% identity and amino  
711 acids in a yellow background correspond to positions with over 70% of identity.

712

713 **FIG S5.** Estimated accuracy of the five protein structures of the C-terminal (amino acids  
714 84-260) domain of VPA1328 obtained through comparative homology modelling using  
715 the I-TASSER pipeline. The locations of the predicted G-rich, catalytic and activation  
716 loop are highlighted.

717 **Table S1.** Bacterial strains and plasmids used in this study.

718 **Table S2.** Analysis of the VPA1328 ORF using different T3SS effector prediction  
719 software.

720 **Table S3.** List of the 2044 total VopG protein sequences and the 122 non-redundant  
721 VopG protein sequences identified in bacterial genome databases.

A

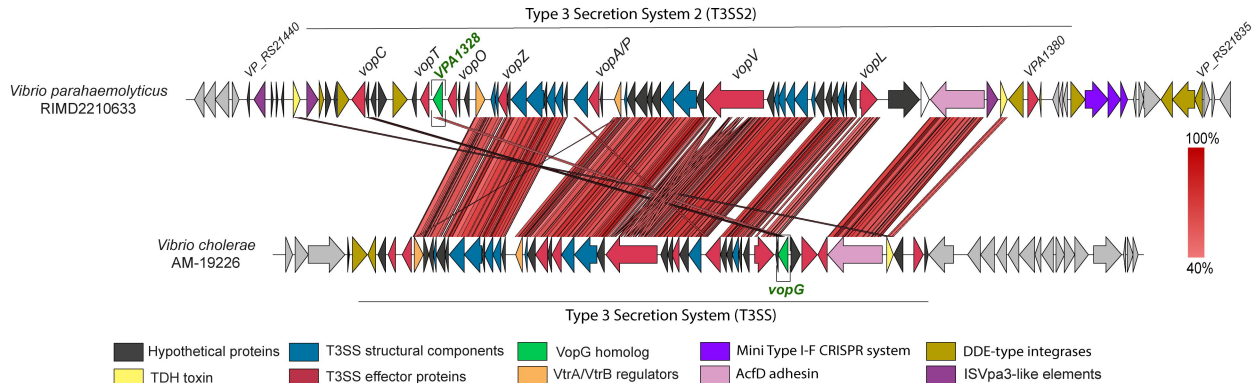

B

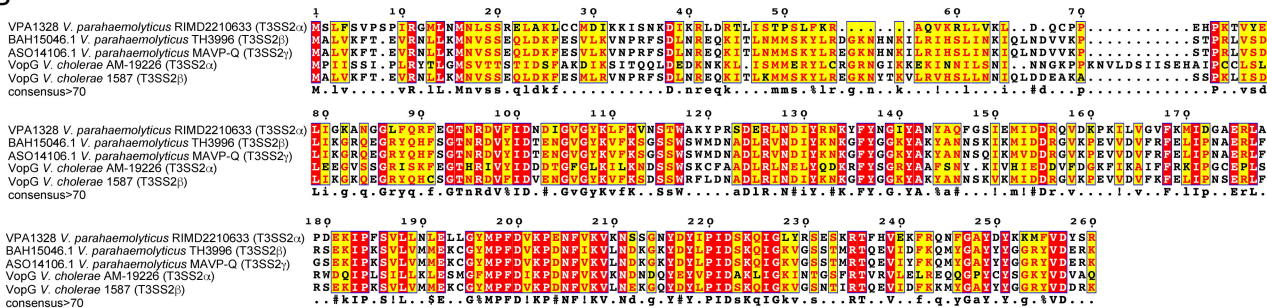

**A**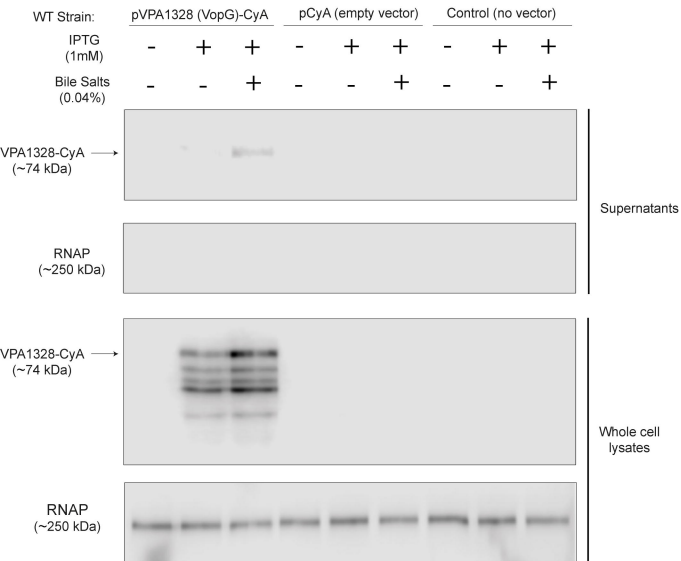**B**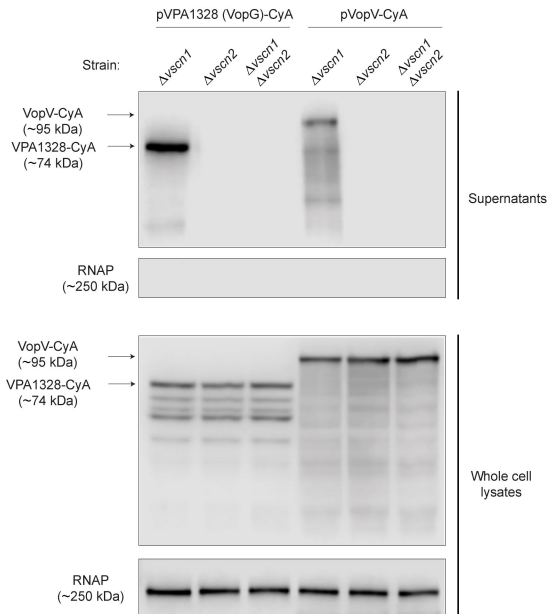



T3SS2 gene cluster

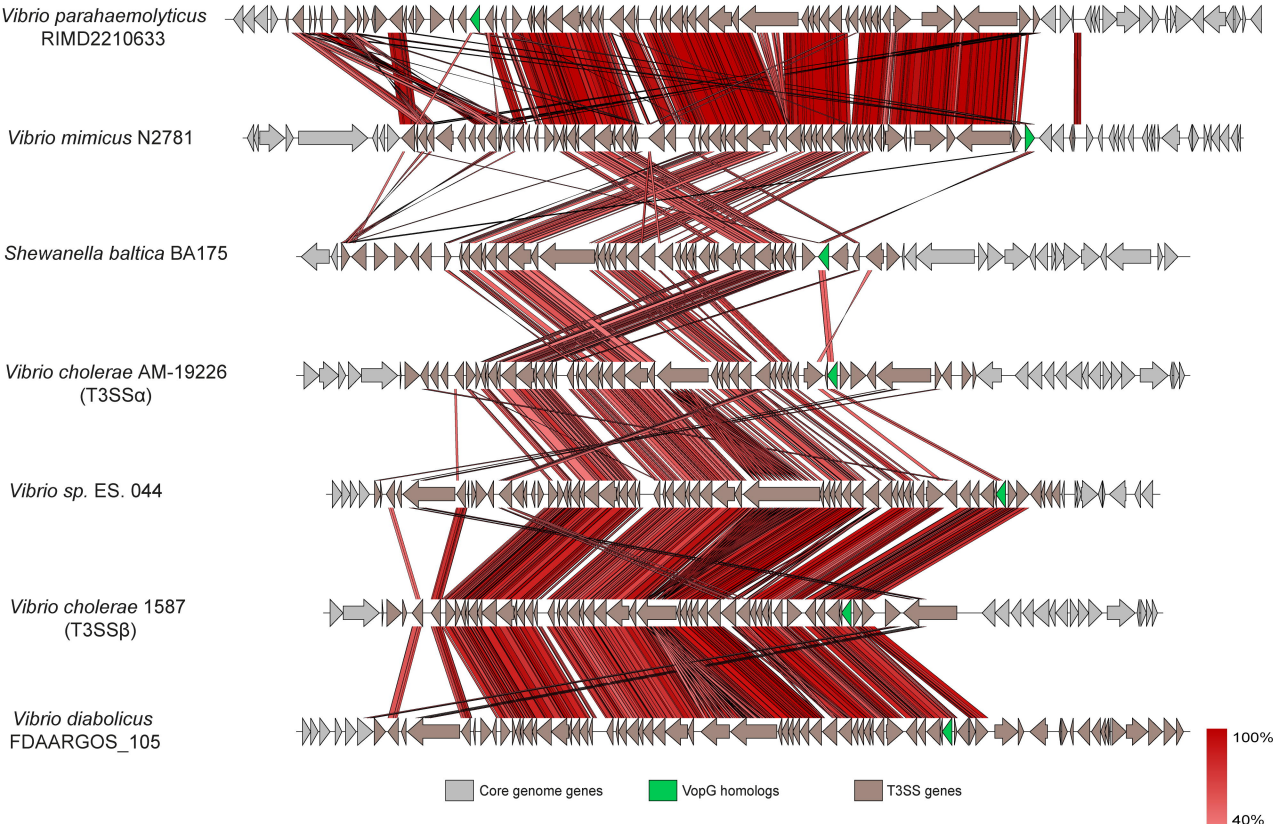



A

NleH1 *E. coli* O157-H7 Sakai

NleH1 *E. coli* O157-H7 Sakai  
 NleH2 *E. coli* O157-H7 Sakai  
 NleH *C. rodentium* DBS100  
 SboH *S. bongori* NCTC12419  
 TspK *V. enterocolitica* 8081  
 AVF62416.1 *V. diabolus* FDAARGOS 105  
 BAH15046.1 *V. parahaemolyticus* TH3996  
 ASO14106.1 *V. parahaemolyticus* MAVP-Q  
 VopG *V. cholerae* 1587  
 TVZ19455.1 *V. sp.* ES\_044  
 VopG *V. cholerae* AM-19226  
 AEG1372.1 *S. baltica* BA175  
 TX145055.1 *V. mimicus* W2781  
 VPA1328 *V. parahaemolyticus* RIMD2210633  
 OspG *Shigella flexneri* 301  
 consensus>70  
 OSpG *Shigella flexneri* 301

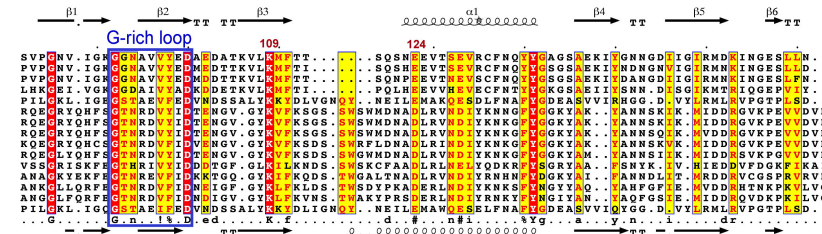NleH1 *E. coli* O157-H7 Sakai

NleH1 *E. coli* O157-H7 Sakai  
 NleH2 *E. coli* O157-H7 Sakai  
 NleH *C. rodentium* DBS100  
 SboH *S. bongori* NCTC12419  
 TspK *V. enterocolitica* 8081  
 AVF62416.1 *V. diabolus* FDAARGOS 105  
 BAH15046.1 *V. parahaemolyticus* TH3996  
 ASO14106.1 *V. parahaemolyticus* MAVP-Q  
 VopG *V. cholerae* 1587  
 TVZ19455.1 *V. sp.* ES\_044  
 VopG *V. cholerae* AM-19226  
 AEG1372.1 *S. baltica* BA175  
 TX145055.1 *V. mimicus* W2781  
 VPA1328 *V. parahaemolyticus* RIMD2210633  
 OspG *Shigella flexneri* 301  
 consensus>70  
 OSpG *Shigella flexneri* 301

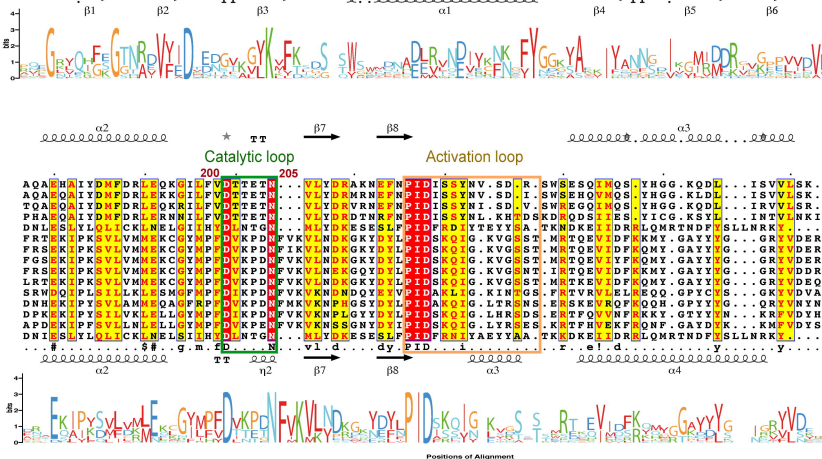

B

- T3S signal
- G-rich loop
- Catalytic loop
- Activation loop

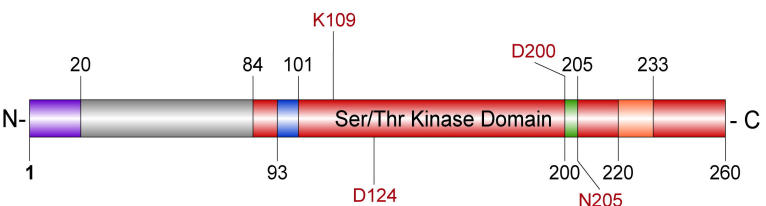

A

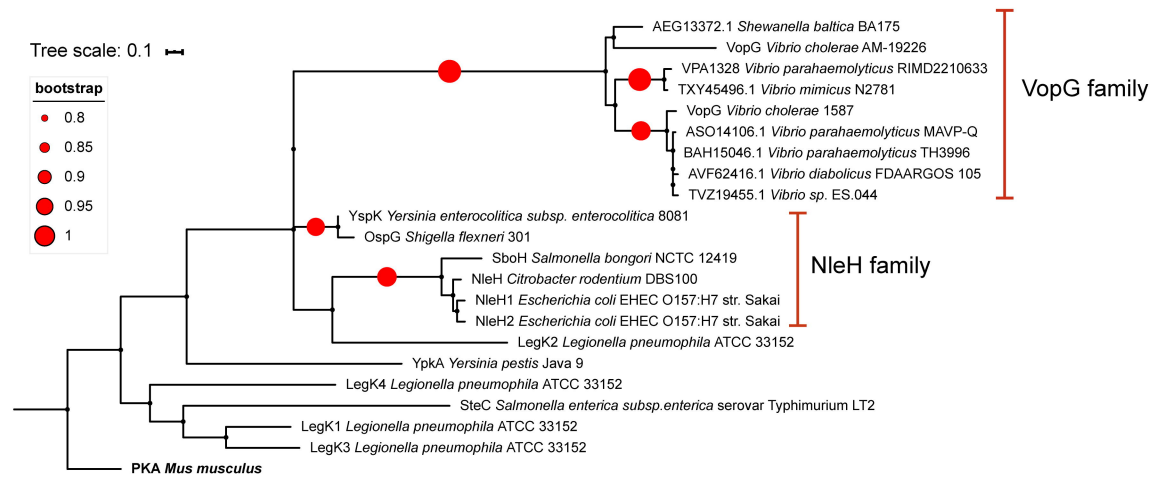

B

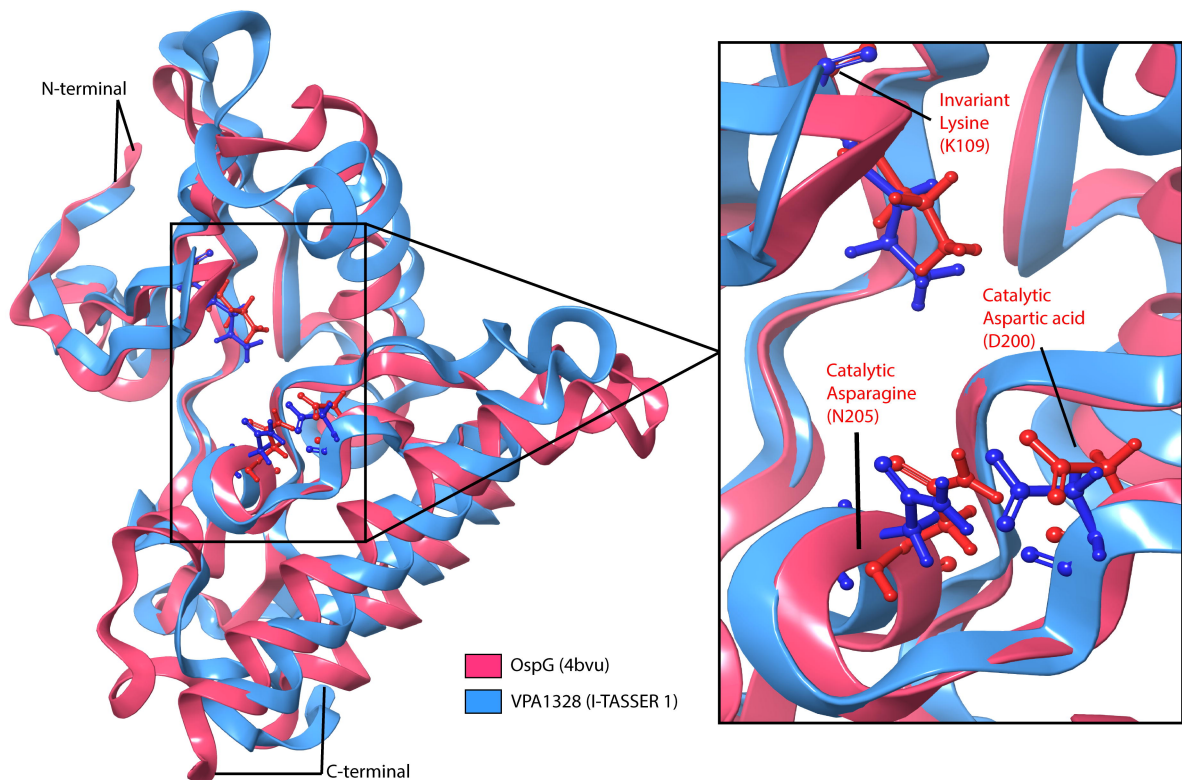

Source: http://biorxiv.org/content/10.1101/2020.12.11.418251v1.full.pdf
